# Supplementary material for: Characterization of Bacterial Communities and Their Antibiotic Resistance Profiles in Wastewaters Obtained from Pharmaceutical Facilities in Lagos and Ogun States, Nigeria
Source: Int J Environ Res Public Health. 2018 Jun 29;15(7):1365. doi: 10.3390/ijerph15071365 (PMC6069043; doi:10.3390/ijerph15071365)
Supplement: Supplementary file 1 [file ijerph-15-01365-s001.pdf]

# Supplementary Materials

**Table S1.** Description of sampled sites.

| Area                 | Sample codes | Site Location   | Sample               | Sample description                        |
|----------------------|--------------|-----------------|----------------------|-------------------------------------------|
| Agbara Ogun State    | WTPi         | 6°30' N 3°5' E  | Untreated wastewater | Central untreated wastewater holding tank |
|                      | WTPii        |                 | Treated water        | Treatment tank                            |
|                      | RWi          | 6°29' N 3°6' E  | River water          | Upstream of receiving water               |
|                      | RWii         | 6°29' N 3°6' E  | River water          | Downstream of receiving water             |
|                      | WWii1        | 6°30' N 3°4' E  | Wastewater           | Wastewater channel                        |
|                      | WWii2        | 6°30' N 3°4' E  | Wastewater           | Wastewater holding tank                   |
|                      | WWiv         | 6°30' N 3°6' E  | Wastewater           | Wastewater outlet                         |
|                      | WWv          | 6°30' N 3°4' E  | Wastewater           | Stored wastewater                         |
| Sango Ota Ogun State | WWi1         | 6°30' N 3°5' E  | Wastewater           | Holding tank                              |
|                      | WWi2         | 6°30' N 3°5' E  | Wastewater           | Discharge point                           |
|                      | WWvi         | 6°42' N 3°13' E | Wastewater           | Outlet to the public drainage             |
| Ikeja-Lagos State    | WWiii        | 7°39' N 5°3' E  | Wastewater           | Holding tank                              |
|                      | WWvii        | 9°46' N 5°56' E | Wastewater           | Discharge channel                         |
|                      | WWviii       | 6°10' N 5°18' E | Wastewater           | Holding tank                              |
|                      | WWix         | -               | Wastewater           | Wastewater channel                        |
| Oshodi-Lagos State   | WWx          | -               | Wastewater           | Holding tank wastewater                   |
| Isolo-Lagos State    | WWxi         | -               | Wastewater           | Holding tank                              |
|                      | WWxii        | -               | Wastewater           | Discharge point                           |
|                      | WWxiii       | -               | Wastewater           | Holding tank                              |
|                      | WWxiv        | -               | Wastewater           | Holding tank                              |

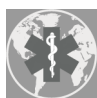

**Table S2.** Colony Forming Unit per mL (CFU/mL) for the Environmental Samples under study on Plate Count Agar.

| S/N | Sample Codes <sup>a</sup> | CFU/mL            |
|-----|---------------------------|-------------------|
| 1   | WWi1                      | $3.8 \times 10^5$ |
| 2   | WWi2                      | $2.2 \times 10^8$ |
| 3   | WWii1                     | $4.8 \times 10^5$ |
| 4   | WWii2                     | $0.3 \times 10^7$ |
| 5   | WWiii                     | $4.5 \times 10^5$ |
| 6   | WWiv                      | $3.7 \times 10^5$ |
| 7   | WWv                       | $2.2 \times 10^8$ |
| 8   | WWviii                    | $6.6 \times 10^5$ |
| 9   | WWix                      | $1.2 \times 10^4$ |
| 10  | WWxii                     | $0.1 \times 10^7$ |
| 11  | WTPi                      | $3.6 \times 10^4$ |
| 12  | WTPii                     | $2.6 \times 10^6$ |
| 13  | RWi                       | $2.2 \times 10^5$ |
| 14  | RWii                      | $0.6 \times 10^5$ |

<sup>a</sup> WW denotes Wastewaters from individual pharmaceutical facilities; WTP wastewater from the Wastewater Treatment Plant; RW, River Water.

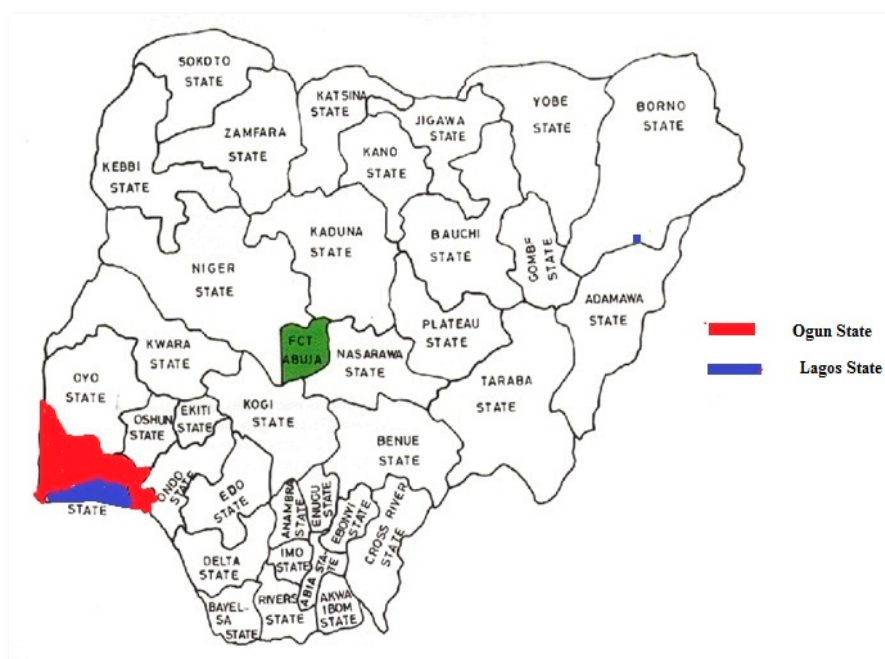

**Figure S1.** Map of Nigeria highlighting the study areas: Ogun and Lagos States.

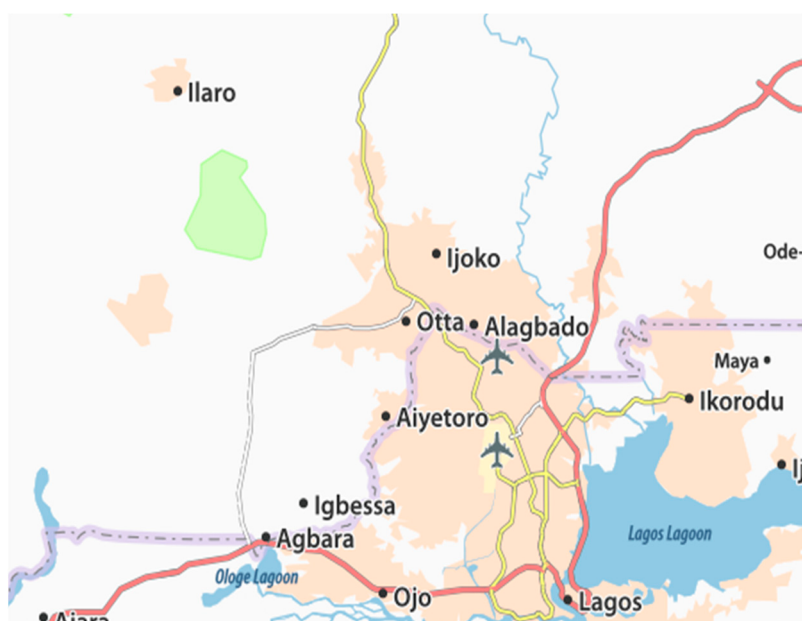

**Figure S2.** A section of the map of Nigeria showing Agbara Industrial Area in Ogun State.

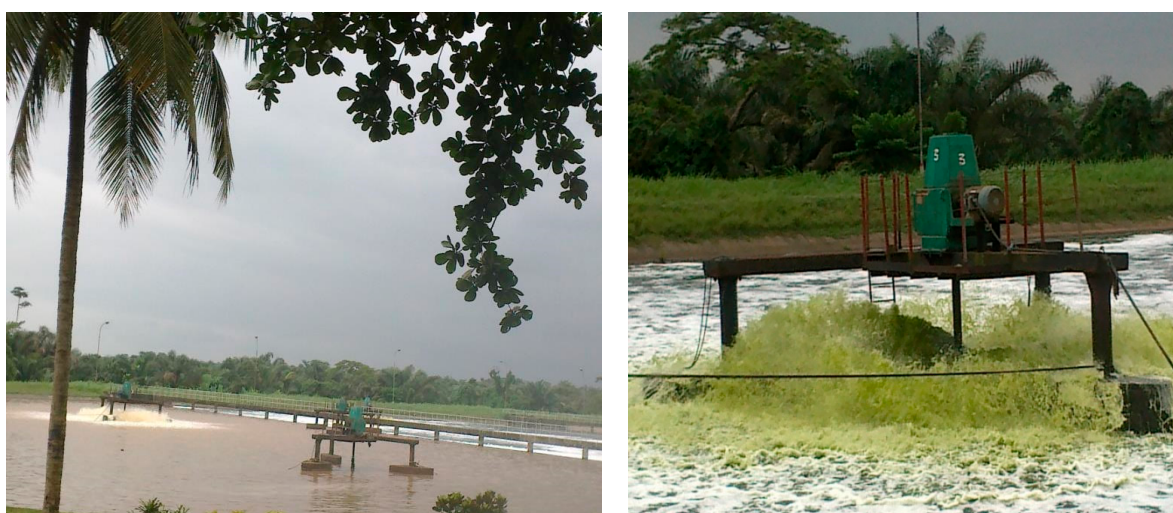

**Plate S1.** Cross-section of the wastewater treatment Plant located in Agbara Industrial Estate, in Ogun State, Nigeria.

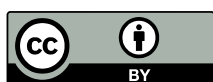

© 2018 by the authors. Submitted for possible open access publication under the terms and conditions of the Creative Commons Attribution (CC BY) license (<http://creativecommons.org/licenses/by/4.0/>).
